# Supplementary material
Source: PubMed Central journal article supplement (PMC3564060)

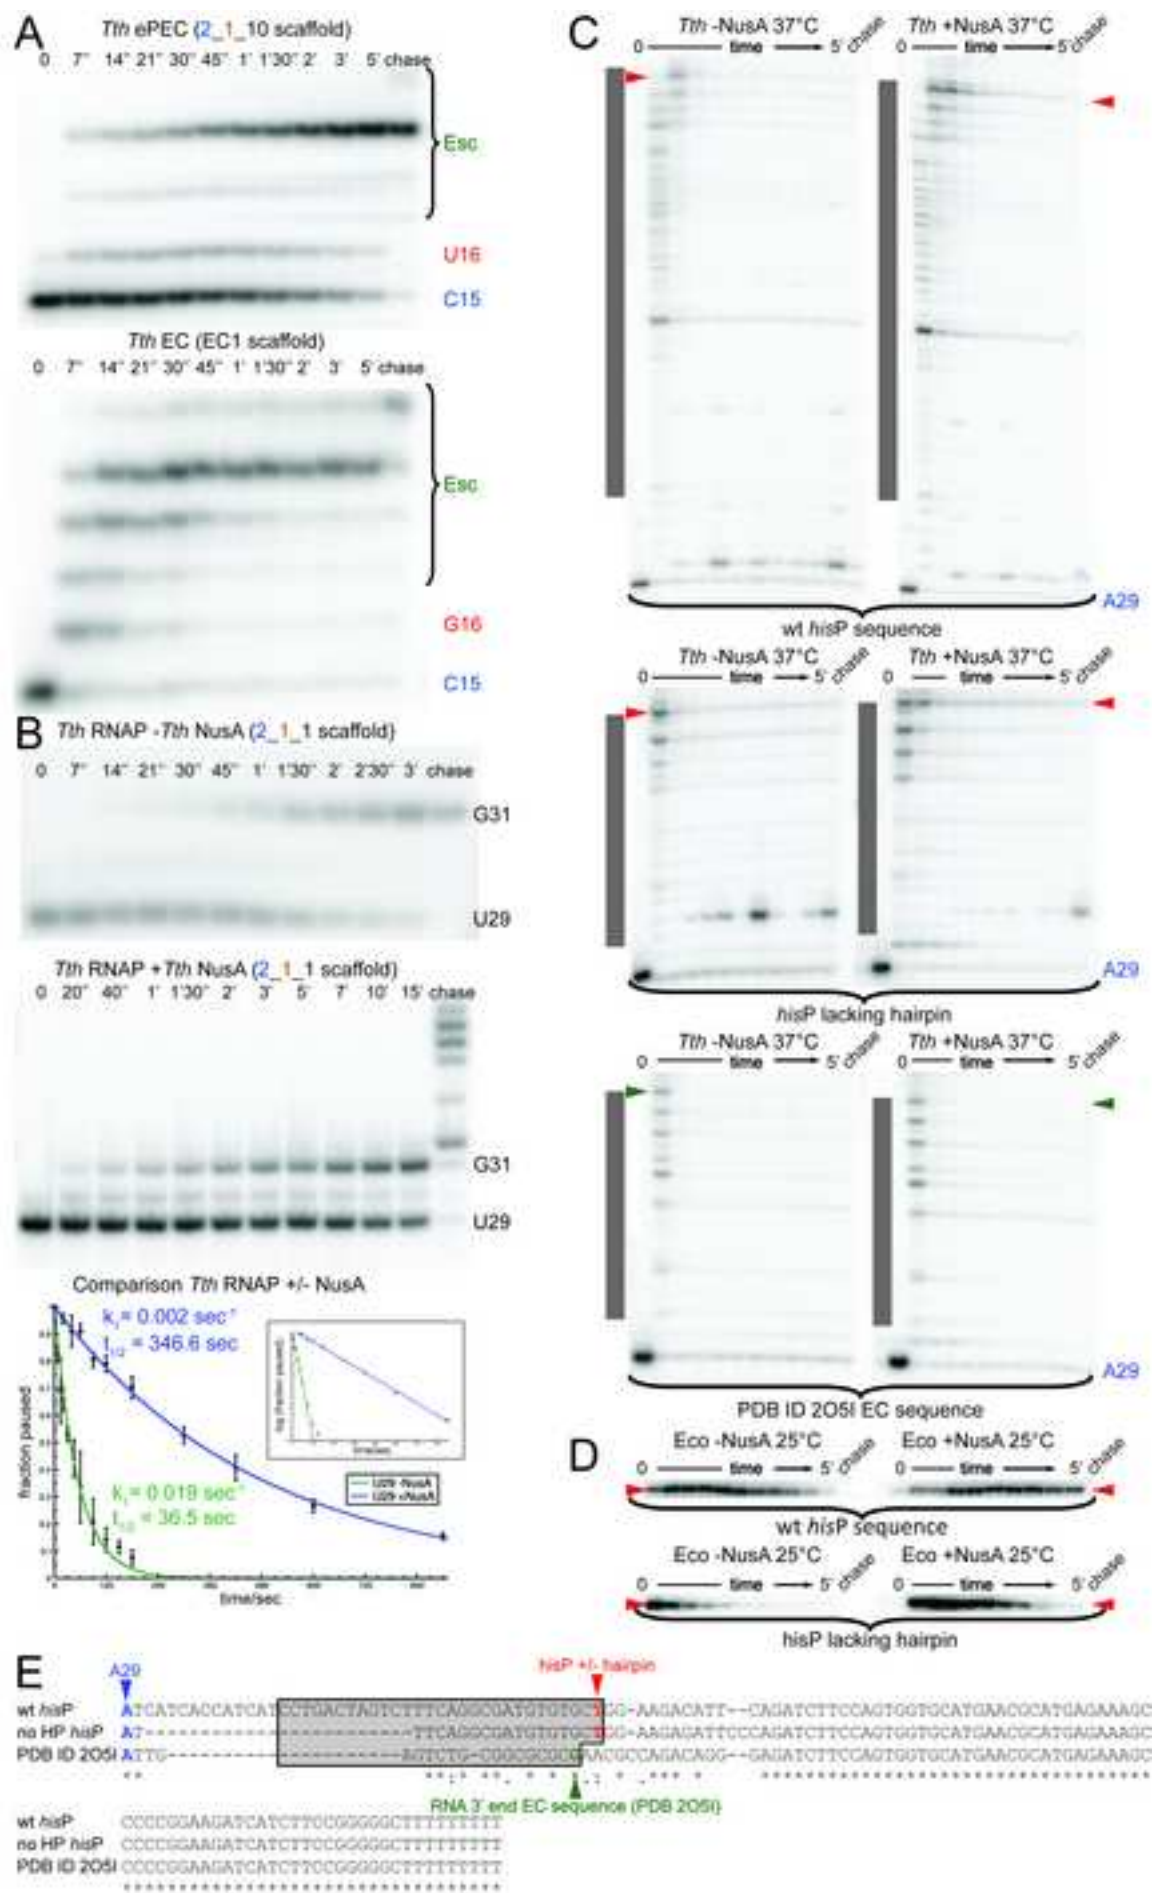

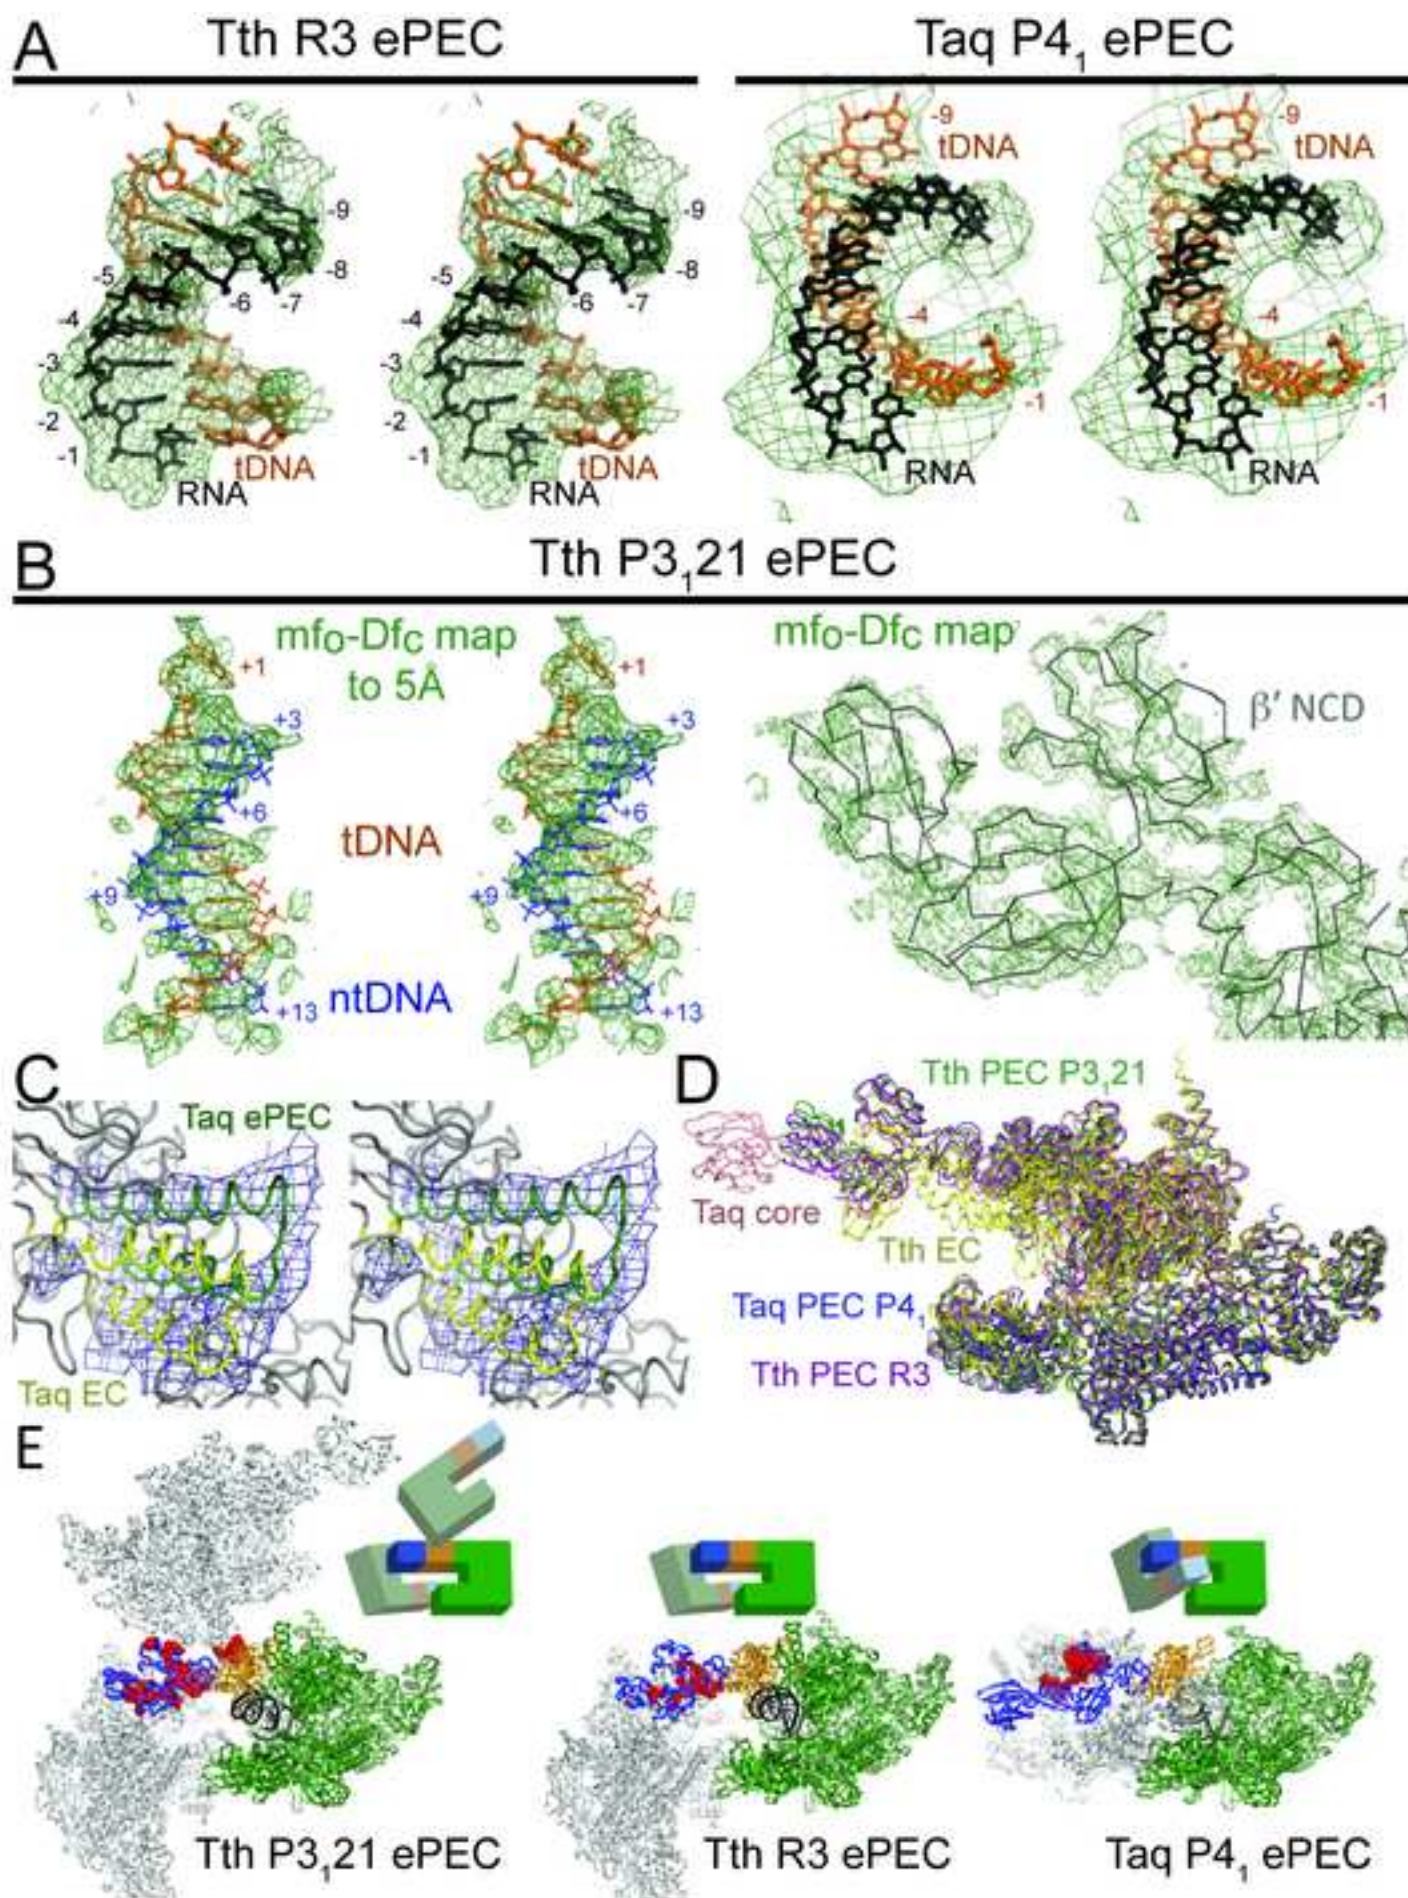

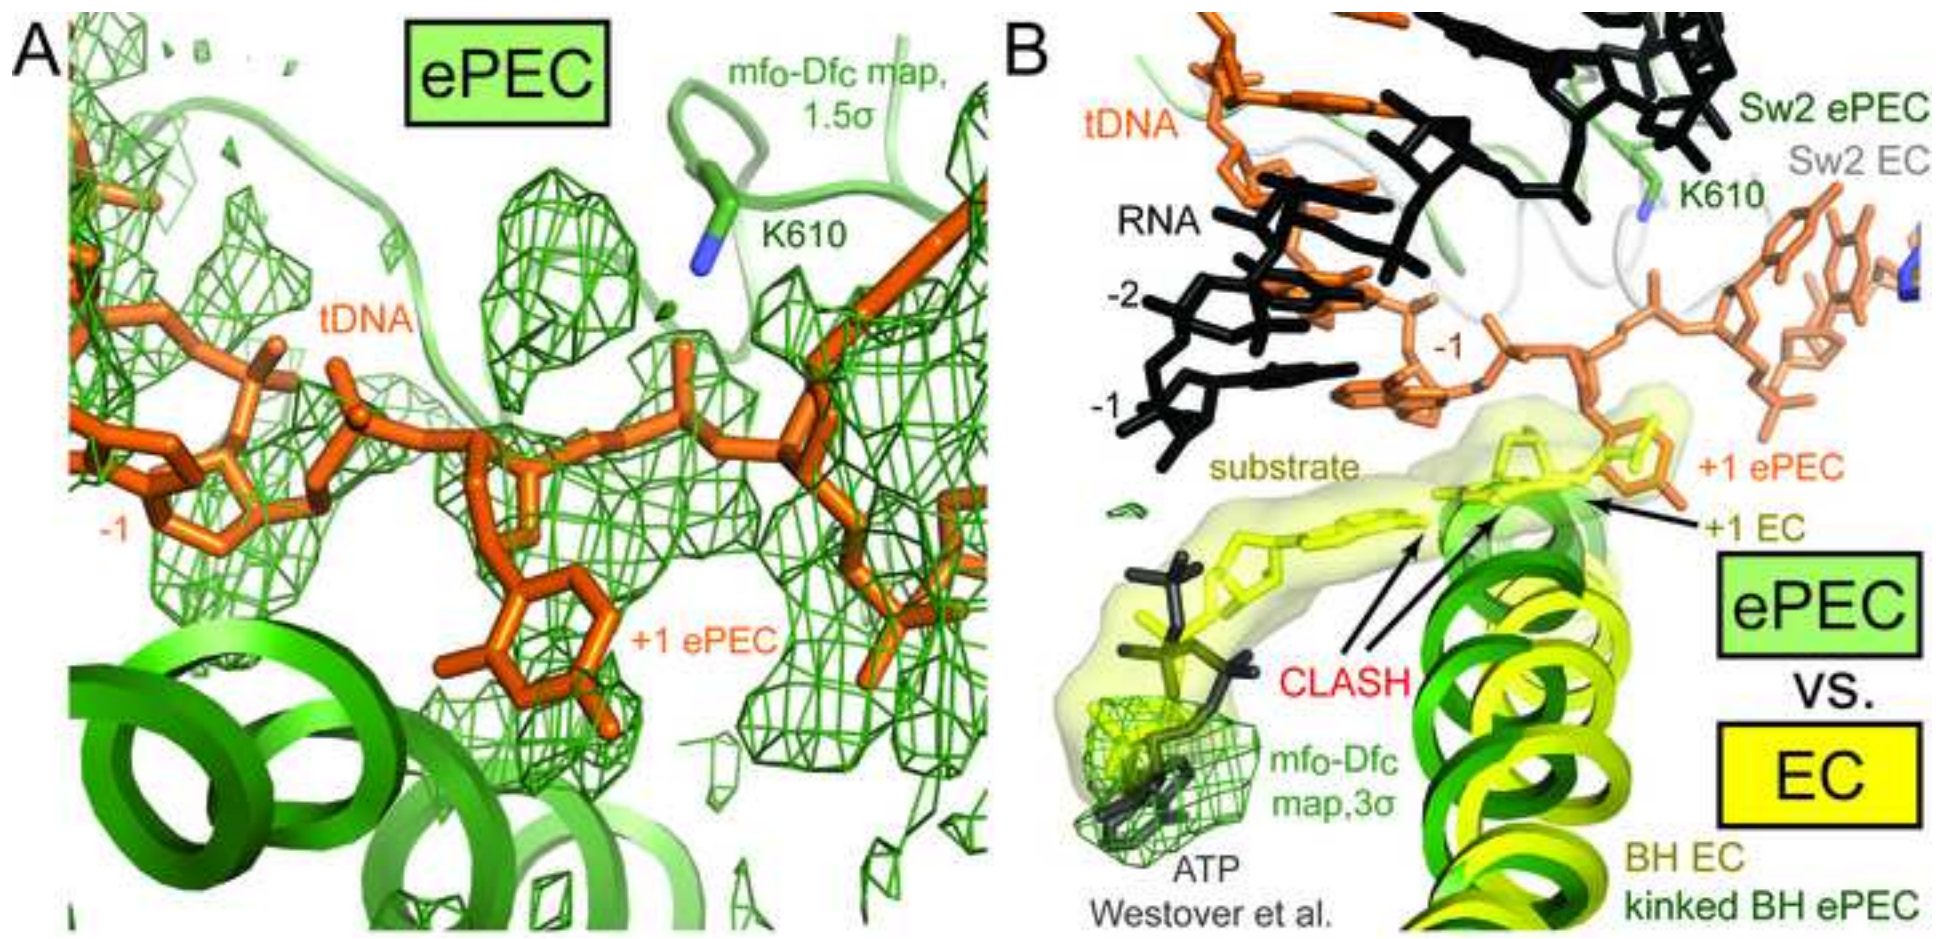

**A** Cross-crystal averaged mapstDNA at  $0.8\sigma$ RNA at  $1.2\sigma$ 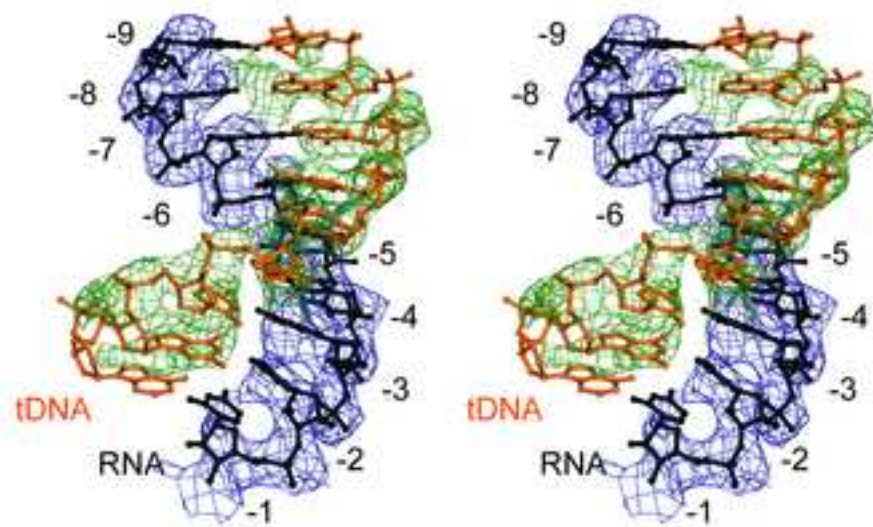**B** RNA/DNA hybrid

(PDB ID 2O5I)

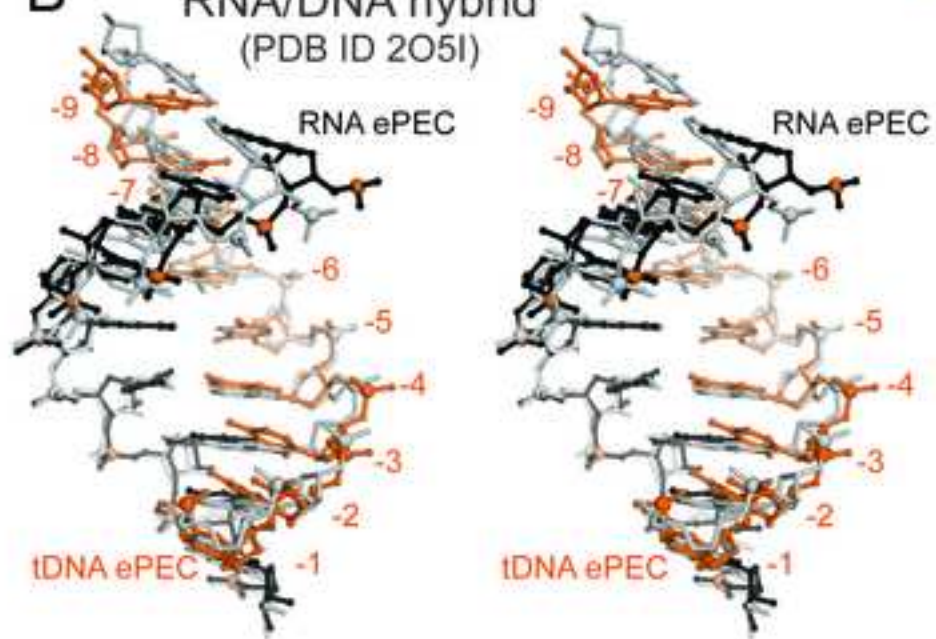**C**RNA  
(PDB ID 2O5I)

SA-omit map

 $2.5\sigma$ 

mfo-Dfc map

 $2.5\sigma$ 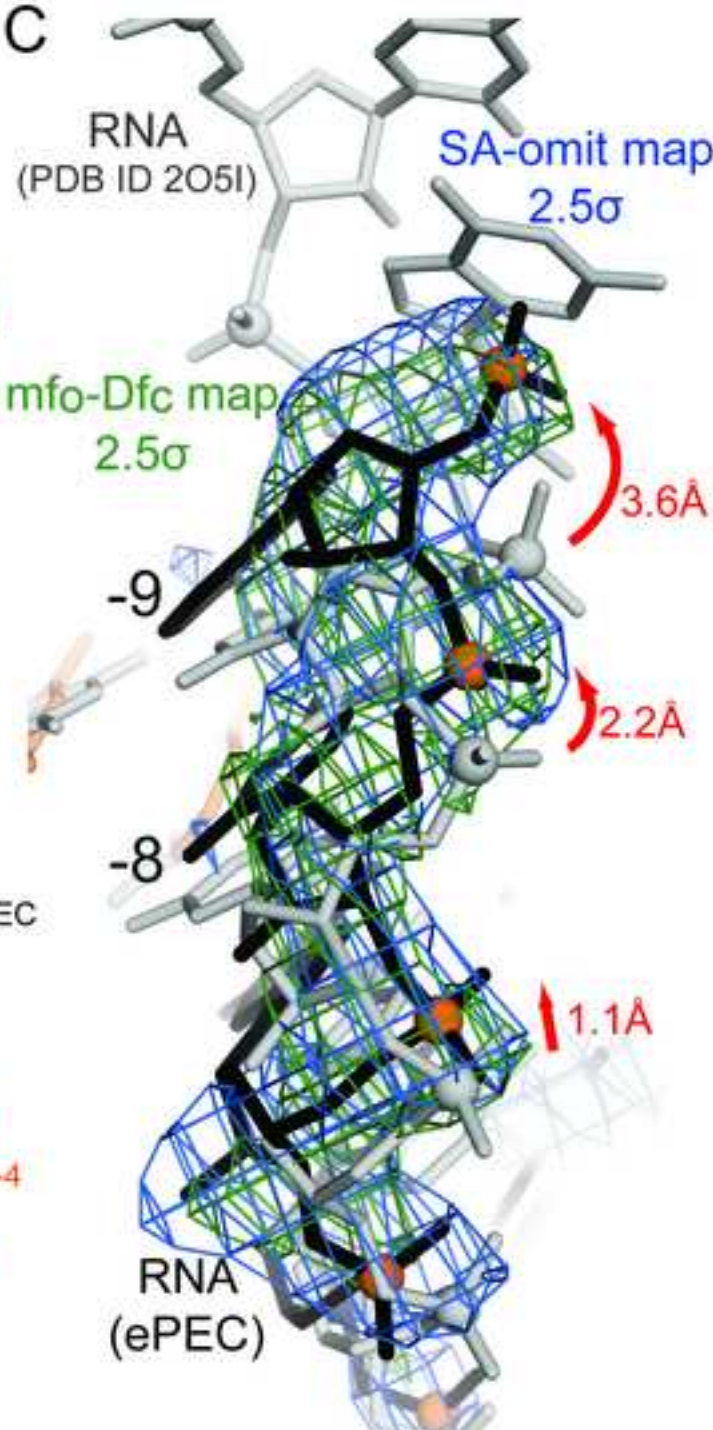

Supplement: NIHMS431112-supplement-03.pdf [file NIHMS431112-supplement-03.pdf]
